# Supplementary material for: The synergistic effect of Er3+ and Ho3+ on temporal color tuning of upconversion emission in a glass host via a facile excitation modulation technique for anti-counterfeiting applications
Source: Royal Society of Chemistry journal article supplement (doi:10.1039/d0cp04809g), 2020-01-01
Supplement: d0cp04809g1.pdf [file d0cp04809g1.pdf]

### Supplementary information

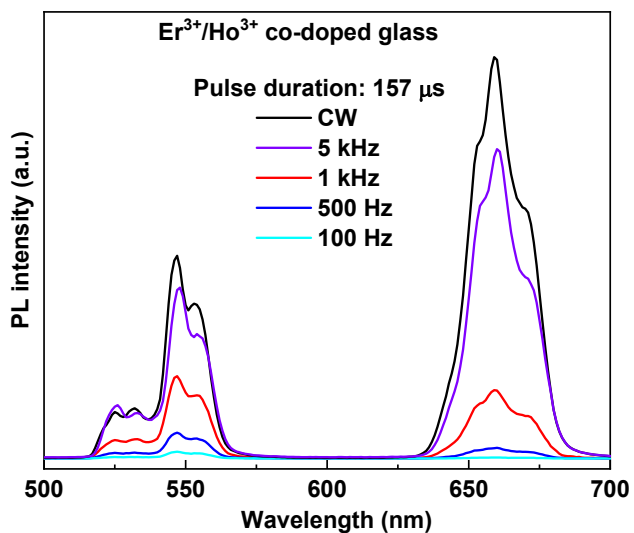

**Figure S1.** UC PL emission spectra of Er<sup>3+</sup>/Ho<sup>3+</sup> co-doped glass obtained under different repetition frequency with a fixed pulse duration of 157 μs.

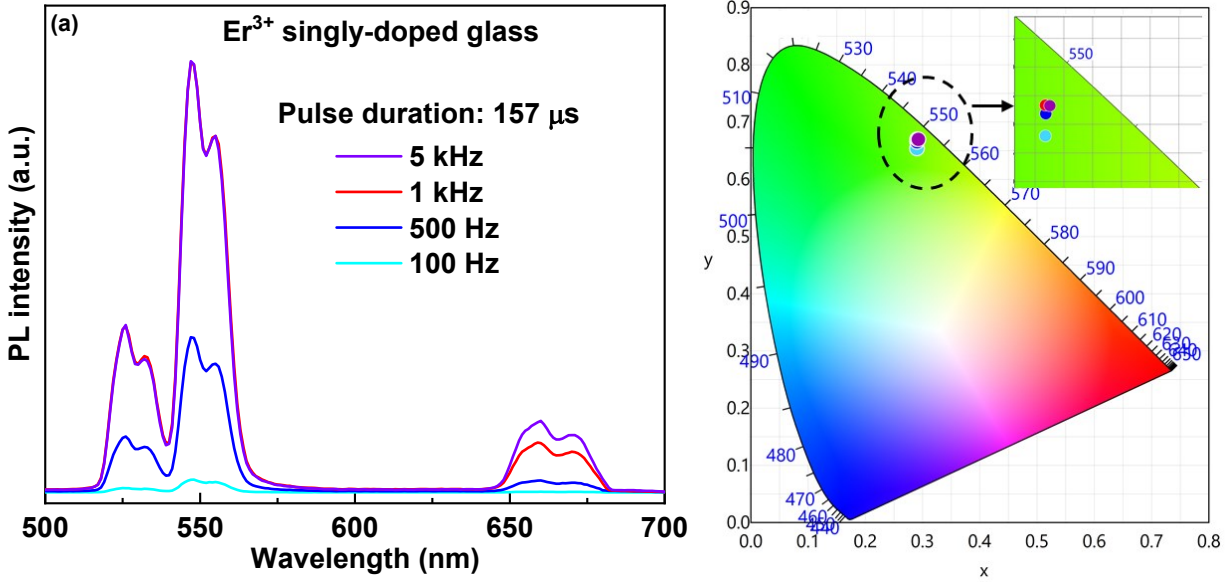

**Figure S2.** (a) UC PL emission spectra of Er<sup>3+</sup> singly-doped glass obtained under different repetition frequency with a fixed pulse duration of 157 μs and (b) corresponding CIE chromaticity coordinates.

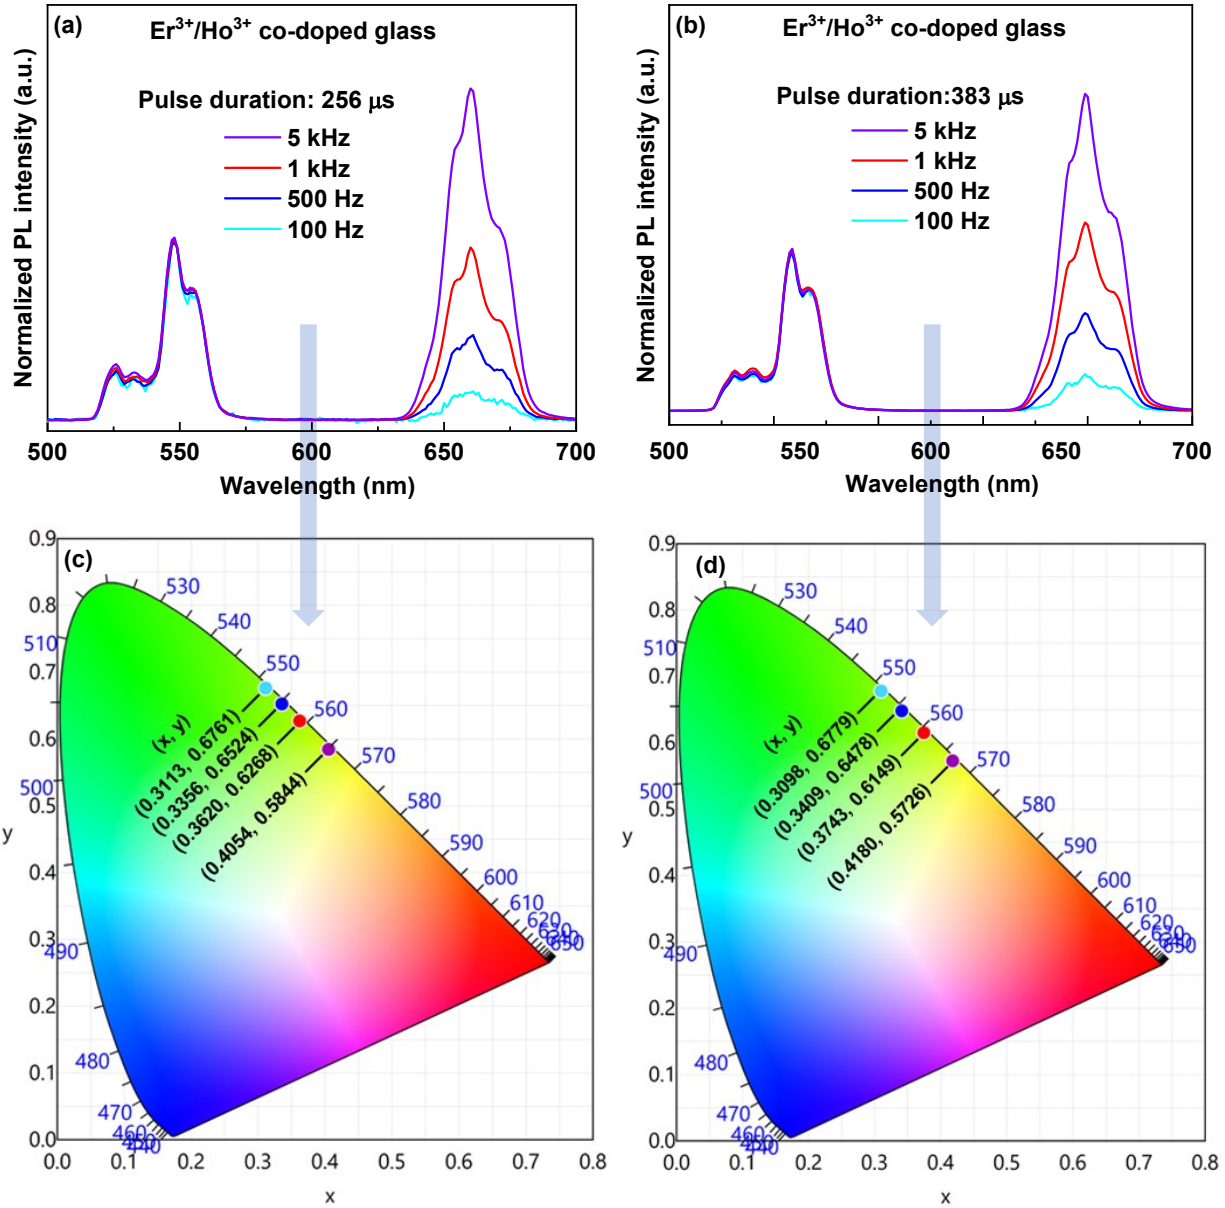

**Figure S3.** UC PL emission spectra of  $\text{Er}^{3+}/\text{Ho}^{3+}$  co-doped glass obtained under different repetition frequency with a fixed pulse duration of (a) 256  $\mu\text{s}$  and (b) 383  $\mu\text{s}$ , (c) and (d) corresponding CIE chromaticity coordinates.

**Table S1.** Line strengths of the transitions used in Judd-Ofelt analysis.

| Transition                                                     | $\lambda$ (nm) | $S_{\text{exp}}$ | $S_{\text{theo}}$ |
|----------------------------------------------------------------|----------------|------------------|-------------------|
| <b>Er<sup>3+</sup> → Ground state: <math>^4I_{15/2}</math></b> |                |                  |                   |
| $^2H_{11/2}$                                                   | 519            | 2.97             | 2.97              |
| $^4I_{9/2}$                                                    | 798            | 0.18             | 0.20              |
| $^4I_{11/2}$                                                   | 973            | 0.30             | 0.27              |
| $^4I_{13/2}$                                                   | 1530           | 1.31             | 1.32              |
| $\delta_{\text{rms}}$                                          |                |                  | 0.0426            |
| <b>Ho<sup>3+</sup> → Ground state: <math>^5I_8</math></b>      |                |                  |                   |
| $^5G_5$                                                        | 418            | 0.97             | 0.93              |
| $^5F_1 + ^5G_6$                                                | 448            | 7.00             | 7.00              |
| $^5F_5$                                                        | 644            | 0.92             | 0.97              |
| $^5I_6$                                                        | 1152           | 0.41             | 0.37              |
| $^5I_7$                                                        | 1947           | 0.93             | 0.93              |
| $\delta_{\text{rms}}$                                          |                |                  | 0.0540            |
